# Supplementary material for: Scalable Reporter Assays to Analyze the Regulation of stx2 Expression in Shiga Toxin-Producing Enteropathogens
Source: MDPI journal article supplement (doi:10.3390/toxins13080534), 2021-07-29
Supplement: s1 [file s1]

# Supplementary Materials: Scalable Reporter Assays to Analyze the Regulation of *stx2* Expression in Shiga Toxin-Producing Enteropathogens

Martin B. Koeppel, Jana Glaser, Tobias Baumgartner, Stefanie Spriewald, Roman G. Gerlach, Benedikt v. Armansperg, John M. Leong and Bärbel Stecher

**Table S1.** Information for Reporter strain construction.

| Strain | Template Plasmid | Forward Primer                                               | Reverse Primer          | Proof Primer Fw  | Proof Primer Rev   |
|--------|------------------|--------------------------------------------------------------|-------------------------|------------------|--------------------|
| MBK1   | pWRG7            | Stx2-SFGFP fusion Fw                                         | Stx2_Com fusion Rev     | Stx2 operon Fw   | Stx2 operon Rev    |
| MBK4   | pWRG7            | Stx2-SFGFP fusion Fw                                         | Stx2 R/S Com fusion Rev | Stx2 operonFw    | R/S outside Rev    |
| MBK6   | P3121            | Stx2-Luc fusion Fw                                           | Stx2_Com fusion Rev     | Stx2 operonFw    | Stx2 operon Rev    |
| MBK7   | P3121            | Stx2-Luc fusion Fw                                           | Stx2 R/S Com fusion Rev | Stx2 operon Fw   | R/S outside Rev    |
| MBK22  | pMBK3            | not applicable (linearized plasmid was used as template DNA) |                         | Stx2A outside Fw | DBS770 outside Rev |
| JLG6   | pWRG701          | Stx2-Gluc fusion Fw                                          | Stx2 R/SCom fusion Rev  | Stx2A outside Fw | R/S outside Rev    |
| JLG11  | pJLG1            | Stx2-T7 pol fusion                                           | Stx2_Com fusion Rev     | Stx2A outside Fw | Stx2B primer Rev   |
| JLG12  | pJLG1            | Stx2-T7 pol fusion                                           | Stx2 R/S Com fusion Rev | Stx2A outside Fw | R/S outside Rev    |

Table S2. Primers used in this study.

| Designation             | Sequence (5'-3')                                                                          | Reference  |
|-------------------------|-------------------------------------------------------------------------------------------|------------|
| Stx2 operon Fw          | GATCGGTATGTTGAGCGTGA                                                                      | This study |
| Stx2 operon Rev         | TGCTCAGTCTGACAGGCAAC                                                                      | This study |
| Stx2-SFGFP fusion Fw    | TATATCTGCGCCGGTCTGGTGCTGAT-<br>TACTTCAGCCAAAAGGAACACCTGTATATGCG-<br>CAAAGGCGAAGAACTGTTTAC | This study |
| Stx2_Com fusion Rev     | ATTAACAGAAGCTAATGCAAATAAAACCGCCA-<br>TAAACATCTTCTTCATGCTTAACCTCTCGTGTAGGCTGGAGCTGCTTC     | [35]       |
| Stx2 R/S Com fusion Rev | CAGGATTTCTGTATCCGTCCAGGTAAGCAAACCTCATTTTTTCAG-<br>CAAAATATTCTTCCGTGTAGGCTGGAGCTGCTTC      | This study |
| Stx2-Luc fusion Fw      | TTATATCTGCGCCGGTCTGGTGCTGAT-<br>TACTTCAGCCAAAAGGAACACCTGTATATGGAA-<br>GACGCCAAAAACATAAGAA | This study |
| Stx2-Gluc fusion Fw     | TTTTATATCTGCGCCGGTCTGGTGCTGAT-<br>TACTTCAGCCAAAAGGAACACCTG-<br>TATATGAAACCGACCGAAAACAACGA | [35]       |
| Stx2-T7 pol fusion      | TATATCTGCGCCGGTCTGGTGCTGAT-<br>TACTTCAGCCAAAAGGAACACCTGTATATGAACAC-<br>GATTAACATCGCTAAGAA | This study |
| Stx2A outside Fw        | AGACGGTCAGGGAAGTTCAG                                                                      | [35]       |
| Stx2B primer Rev        | AATCCGGAGCCTGATTCACA                                                                      | [35]       |
| R/S outside Rev         | GAGATGCGCAGAAATGACAA                                                                      | This study |
| DBS770 outside Rev      | GCGCGGATCCTTCGAATAAA                                                                      | [35]       |
| GA DBS Stx2 up Fw       | GGCTGACATGGGAATTCCTGCAGCCCGGGGATCCTCAGTCAGAAC-<br>GGATGATATTGCAG                          | [35]       |
| GA DBS Stx2 up Rev      | TTCGGTCGGTTTCATATACAGGTGTTTCCTTTGGCTGAAG                                                  | [35]       |
| GA DBS GlucKan Fw       | AAGGAACACCTGTATATGAAACCGACCGAAAACAACGAAG                                                  | [35]       |
| GA DBS GlucKan Rev      | AGCTAAGGAAGCTAACGTGTAGGCTGGAGCTGC                                                         | [35]       |

---

|                  |                                                              |            |
|------------------|--------------------------------------------------------------|------------|
| GA DBS Cm dn Fw  | GCTCCAGCCTACACGTTAGCTTCCTTAGCTCCTGAAAATCTC                   | This study |
| GA DBS Cm dn Rev | AAGCTCAATAAAAAGCCCCACCGCGGTGGCGGCCGCTTGATCCG-<br>CAGGCGCTTAC | This study |

---
